# Supplementary material
Source: PubMed Central journal article supplement (PMC2610159)
Supplement: rsbl20080223s55.pdf [file rsbl20080223s55.pdf]

## ELECTRONIC SUPPLEMENTARY MATERIALS

### Three-dimensional molar enamel distribution and thickness in *Australopithecus* and *Paranthropus*

A. J. Olejniczak<sup>1\*</sup>, T. M. Smith<sup>1</sup>, M. M. Skinner<sup>1</sup>, F. E. Grine<sup>2,3</sup>, R. N. M. Feeney<sup>1</sup>, J. F. Thackeray<sup>4</sup>, J-J. Hublin<sup>1</sup>

#### *Bootstrap resampling*

The enamel thickness indexes 3DAET and 3DRET were subjected to bootstrap resampling with replacement. One thousand calculations of the mean value were performed by selecting  $n$  values at random, with replacement, from the original sample ( $n$  corresponds to the actual sample size for that taxon; see main document's Table 2).

Results of the mean calculation, and 95% confidence intervals are given below as

Supplementary Table 1.

Supplementary Table 1: Resampled mean values of 3DAET and 3DRET, and 95% confidence intervals.

| Taxon                             | Sample mean 3DAET (mm) | Bootstrap mean 3DAET (mm) | 3DAET 95% C.I. | Sample mean 3DRET | Mean 3DRET | 3DRET 95% C.I.  |
|-----------------------------------|------------------------|---------------------------|----------------|-------------------|------------|-----------------|
| <i>Homo sapiens</i>               | 1.43                   | 1.41                      | 1.409 - 1.414  | 23.97             | 23.55      | 23.494 - 23.608 |
| <i>Paranthropus robustus</i>      | 1.83                   | 1.84                      | 1.830 - 1.845  | 23.27             | 23.23      | 23.130 - 23.336 |
| <i>Australopithecus africanus</i> | 1.48                   | 1.48                      | 1.472 - 1.484  | 17.70             | 17.71      | 17.623 - 17.791 |
| <i>Homo neandertalensis</i>       | 1.08                   | 1.08                      | 1.082 - 1.086  | 15.55             | 15.51      | 15.479 - 15.539 |
| <i>Hylobates muelleri</i>         | 0.49                   | 0.49                      | 0.487 - 0.490  | 14.72             | 14.73      | 14.685 - 14.771 |
| <i>Pongo pygmaeus</i>             | 1.01                   | 1.01                      | 1.003 - 1.009  | 14.49             | 14.48      | 14.441 - 14.521 |
| <i>Pan troglodytes</i>            | 0.75                   | 0.75                      | 0.753 - 0.7553 | 11.80             | 11.80      | 11.778 - 11.812 |
| <i>Symphalangus syndactylus</i>   | 0.55                   | 0.55                      | 0.545 - 0.548  | 11.15             | 11.15      | 11.117 - 11.175 |
| <i>Gorilla gorilla</i>            | 0.98                   | 0.98                      | 0.978 - 0.986  | 9.77              | 9.75       | 9.712 - 9.779   |

*Pairwise enamel thickness differences*

Conover's post-hoc pairwise comparisons for the Kruskal-Wallis test are reported below as Supplementary Table 2. X's indicate that groups have significantly different mean values for the variable in question. The Kruskal-Wallis test statistics are given below the table.

Supplementary Table 2: Kruskal-Wallis post-hoc results for group differences in 3D enamel thickness measurements.

| Group 1                           | Group 2                         | 3DAET* | 3DRET* |
|-----------------------------------|---------------------------------|--------|--------|
| <i>Australopithecus africanus</i> | <i>Paranthropus robustus</i>    |        | X      |
| <i>Australopithecus africanus</i> | <i>Gorilla gorilla</i>          | X      | X      |
| <i>Australopithecus africanus</i> | <i>Hylobates muelleri</i>       | X      | X      |
| <i>Australopithecus africanus</i> | <i>Symphalangus syndactylus</i> | X      | X      |
| <i>Australopithecus africanus</i> | <i>Pan troglodytes</i>          | X      | X      |
| <i>Australopithecus africanus</i> | <i>Pongo pygmaeus</i>           | X      | X      |
| <i>Australopithecus africanus</i> | <i>Homo sapiens</i>             |        | X      |
| <i>Australopithecus africanus</i> | <i>Homo neanderthalensis</i>    | X      |        |
| <i>Paranthropus robustus</i>      | <i>Gorilla gorilla</i>          | X      | X      |
| <i>Paranthropus robustus</i>      | <i>Hylobates muelleri</i>       | X      | X      |
| <i>Paranthropus robustus</i>      | <i>Symphalangus syndactylus</i> | X      | X      |
| <i>Paranthropus robustus</i>      | <i>Pan troglodytes</i>          | X      | X      |
| <i>Paranthropus robustus</i>      | <i>Pongo pygmaeus</i>           | X      | X      |
| <i>Paranthropus robustus</i>      | <i>Homo sapiens</i>             | X      |        |
| <i>Paranthropus robustus</i>      | <i>Homo neanderthalensis</i>    | X      | X      |
| <i>Gorilla gorilla</i>            | <i>Hylobates muelleri</i>       | X      | X      |
| <i>Gorilla gorilla</i>            | <i>Symphalangus syndactylus</i> | X      |        |
| <i>Gorilla gorilla</i>            | <i>Pan troglodytes</i>          | X      | X      |
| <i>Gorilla gorilla</i>            | <i>Pongo pygmaeus</i>           |        | X      |
| <i>Gorilla gorilla</i>            | <i>Homo sapiens</i>             | X      | X      |
| <i>Gorilla gorilla</i>            | <i>Homo neanderthalensis</i>    |        | X      |
| <i>Hylobates muelleri</i>         | <i>Symphalangus syndactylus</i> |        | X      |
| <i>Hylobates muelleri</i>         | <i>Pan troglodytes</i>          | X      | X      |
| <i>Hylobates muelleri</i>         | <i>Pongo pygmaeus</i>           | X      |        |
| <i>Hylobates muelleri</i>         | <i>Homo sapiens</i>             | X      | X      |
| <i>Hylobates muelleri</i>         | <i>Homo neanderthalensis</i>    | X      |        |
| <i>Symphalangus syndactylus</i>   | <i>Pan troglodytes</i>          | X      |        |
| <i>Symphalangus syndactylus</i>   | <i>Pongo pygmaeus</i>           | X      | X      |
| <i>Symphalangus syndactylus</i>   | <i>Homo sapiens</i>             | X      | X      |
| <i>Symphalangus syndactylus</i>   | <i>Homo neanderthalensis</i>    | X      | X      |
| <i>Pan troglodytes</i>            | <i>Pongo pygmaeus</i>           | X      | X      |
| <i>Pan troglodytes</i>            | <i>Homo sapiens</i>             | X      | X      |
| <i>Pan troglodytes</i>            | <i>Homo neanderthalensis</i>    | X      | X      |
| <i>Pongo pygmaeus</i>             | <i>Homo sapiens</i>             | X      | X      |
| <i>Pongo pygmaeus</i>             | <i>Homo neanderthalensis</i>    |        |        |
| <i>Homo sapiens</i>               | <i>Homo neanderthalensis</i>    | X      | X      |

\*X indicates that the group comparison is significant at alpha = 0.05.

3DAET Kruskal-Wallis test statistics: Chi Square = 132.93; p < 0.001.

3DRET Kruskal-Wallis test statistics: Chi Square = 120.079; p < 0.001.

*Enamel thickness versus dentine volume (Supplementary Figure 1)*

Average enamel thickness (3DAET) versus dentine volume (a widely used proxy for tooth size) shows substantial overlap between taxa, particularly among hominins. In light of this overlap, we suggest that dietary interpretations of fossil hominins based on dentine horn height and enamel thickness distribution are more reliable than those based solely on summary enamel thickness measures.

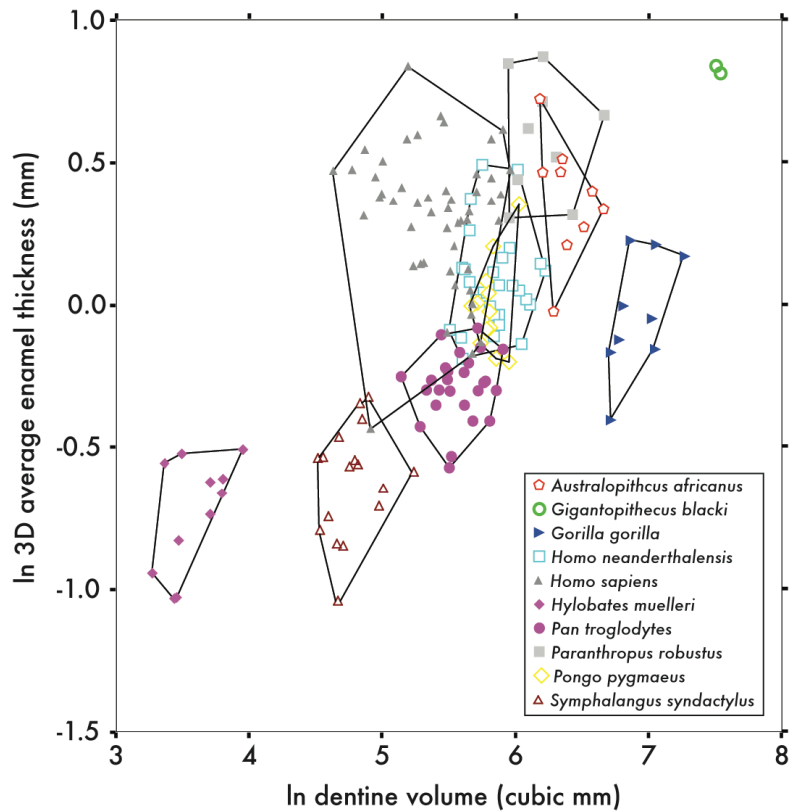

### *Relative dentine horn height*

Following Olejniczak et al. (2008), relative dentine horn height (RDHH) was measured with the following procedure: the height of the dentine horn from a line parallel to the bi-cervical diameter and coursing through the lowest point of enamel in the mid-occlusal basin (horn height) was divided by the total height of the dentine crown measured from the bi-cervical diameter to the dentine horn tip (dentine height), yielding the height of the dentine horn as a percentage of the total height of the dentine crown. The data reported below for *Australopithecus* and *Paranthropus* are new measurements reported here for the first time; measurements of other taxa appeared in Olejniczak et al. (2008a).

Supplementary Table 3: Relative dentine horn height (RDHH) in hominoid taxa (ordered on protocone RDHH).

| Taxon                             | Protocone RDHH (%) | Paracone RDHH (%) | Protoconid RDHH (%) | Metaconid RDHH (%) |
|-----------------------------------|--------------------|-------------------|---------------------|--------------------|
| <i>Gigantopithecus blacki</i>     | 23.93%             | 22.33%            | 28.36%              | 27.18%             |
| <i>Paranthropus robustus</i>      | 27.63%             | 26.66%            | 31.35%              | 28.79%             |
| <i>Pongo pygmaeus</i>             | 28.15%             | 27.13%            | 28.03%              | 30.69%             |
| <i>Sivapithecus sivalensis</i>    | 32.11%             | 35.80%            |                     |                    |
| <i>Australopithecus africanus</i> | 33.88%             | 31.74%            | 32.34%              | 32.23%             |
| <i>Pan troglodytes</i>            | 34.71%             | 37.31%            |                     |                    |
| <i>Homo sapiens</i>               | 35.34%             | 36.17%            | 38.25%              | 34.72%             |
| <i>Gorilla gorilla</i>            | 40.39%             | 38.24%            |                     |                    |
